# Supplementary material for: Covalently layer-by-layer assembled homogeneous nanolayers with switchable wettability
Source: Royal Society of Chemistry journal article supplement (doi:10.1039/c5py00515a), 2015-01-01
Supplement: c5py00515a1.pdf [file c5py00515a1.pdf]

## Supporting Information

# Covalently Layer-by-Layer Assembled Homogeneous Nanolayers with Switchable Wettability

*Fuat Topuz,<sup>a\*</sup> Martin Möller<sup>a</sup> and Jürgen Groll<sup>b</sup>*

<sup>a</sup> DWI-Leibniz Institute for Interactive Materials e.V., RWTH Aachen University, Forckenbeckstrasse 50, 52074 Aachen, Germany.

<sup>b</sup> Department of Functional Materials in Medicine and Dentistry, University of Wuerzburg, Pleicherwall 2, 97070 Wuerzburg,  
Germany

\* Fuat Topuz; Tel: +492418026443, E-mail: [fuat.topuz@rwth-aachen.de](mailto:fuat.topuz@rwth-aachen.de)

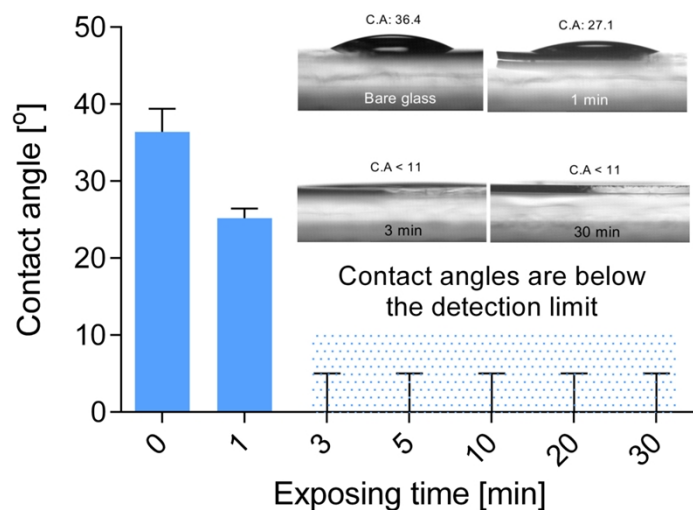

**Figure S1.** Contact angle analysis of UV-ozone activated glass surfaces with different exposure times.

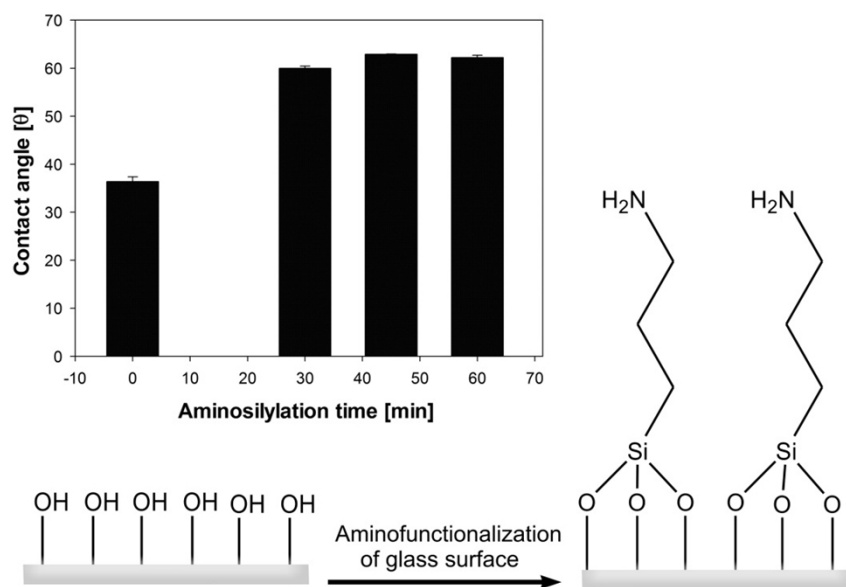

**Figure S2.** Cartoon illustration of aminosilylation of the glass surface with 3-aminopropyl-trimethoxysilane. Inset figure shows changes in contact angles as a function of aminosilylation time.

**Table S1.** Thickness, contact angle and XPS data of the NCO-sP(EO-*stat*-PO) ( $M_w = 12$  kDa) layers.

|            | Thickness (nm)                                        | Water contact angle (°) | C 1s (%) from XPS | O 1s (%) from XPS | N 1s (%) from XPS | Si 2p (%) from XPS |      |
|------------|-------------------------------------------------------|-------------------------|-------------------|-------------------|-------------------|--------------------|------|
| Ref 1      | Monolayer                                             | 1.3                     | -                 | -                 | -                 | -                  |      |
|            | sP(EO- <i>stat</i> -PO) (1 mg/mL in THF(1)/water(9))  | 2.3                     | -                 | 56                | 28.5              | 1.8                | 13.7 |
|            | sP(EO- <i>stat</i> -PO) (10 mg/mL in THF(1)/water(9)) | 30.9                    | -                 | 70.8              | 27                | 2.2                | 0    |
| This study | 1 <sup>st</sup> Layer                                 | 11.93                   | 45.1              | 66.47             | 25.83             | 2.94               | 4.76 |
|            | 2 <sup>nd</sup> Layer                                 | 13.80                   | 37.91             | 67.75             | 26.05             | 4.74               | 2    |
|            | 3 <sup>rd</sup> Layer                                 | 25.46                   | 45.04             | 70.45             | 26.67             | 2.85               | 0    |
|            | 4 <sup>th</sup> Layer                                 | 27.50                   | 37.31             | -                 | -                 | -                  | -    |
|            | 5 <sup>th</sup> layer                                 | 40.2                    | 46.1              | -                 | -                 | -                  | -    |
|            | 6 <sup>th</sup> layer                                 | 42.3                    | 37.61             | -                 | -                 | -                  | -    |

Ref 1. Groll et al. Biomacromolecules 2005, 6, 956-962.

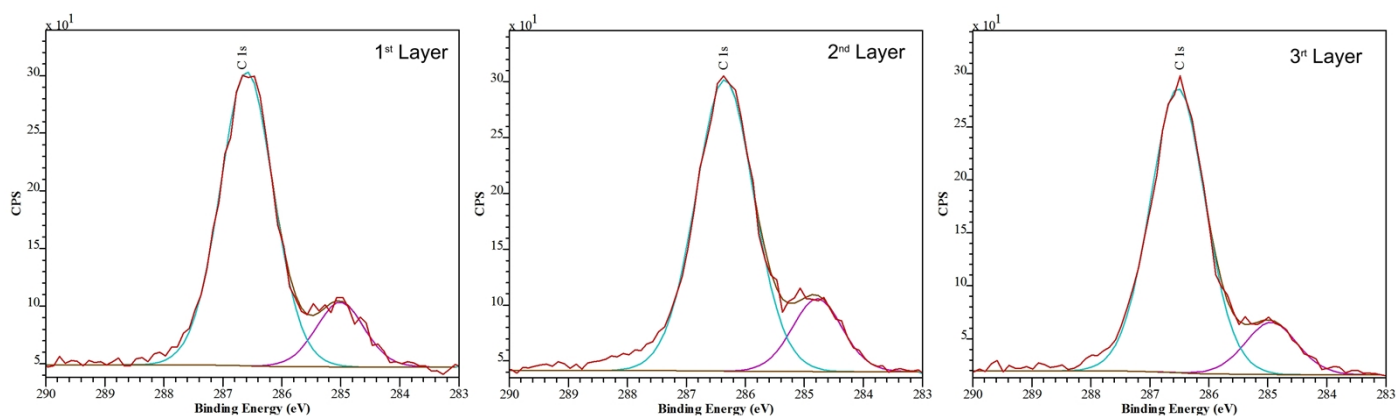

**Figure S3.** XPS C 1s narrow spectra of the layers.

**Table S2.** C 1s atomic composition of the layers obtained by XPS analysis.

|            |                                               | C 1s (%)<br>285 | C 1s (%)<br>286.5 |
|------------|-----------------------------------------------|-----------------|-------------------|
|            |                                               | C-C<br>C-H      | C-O<br>C-N        |
| Ref 1      | Silicon-aminofunctionalized                   | 80.0            | 20.0              |
|            | sP(EO- <i>stat</i> -PO)<br>12000<br>(2.3 nm)  | 15.5            | 84.4              |
|            | sP(EO- <i>stat</i> -PO)<br>12000<br>(30.9 nm) | 14.9            | 84.8              |
| This study | 1 <sup>st</sup> Layer                         | 18.5            | 81.5              |
|            | 2 <sup>nd</sup> Layer                         | 20.4            | 79.5              |
|            | 3 <sup>rd</sup> Layer                         | 14.7            | 85.2              |

Ref 1. Groll et al. Biomacromolecules 2005, 6, 956-962.
